# Supplementary material for: Using a Network of Locally Developed Low Cost Particulate Matter Sensors for Land Use Regression Modeling of PM2.5 in Urban Uganda
Source: Preprints.org preprint supplement (doi:10.20944/preprints202006.0158.v1), 2020-06-14

**Figure A2. Variable importance for each of the 18 LUR predictor variables. Higher values indicate higher importance.**

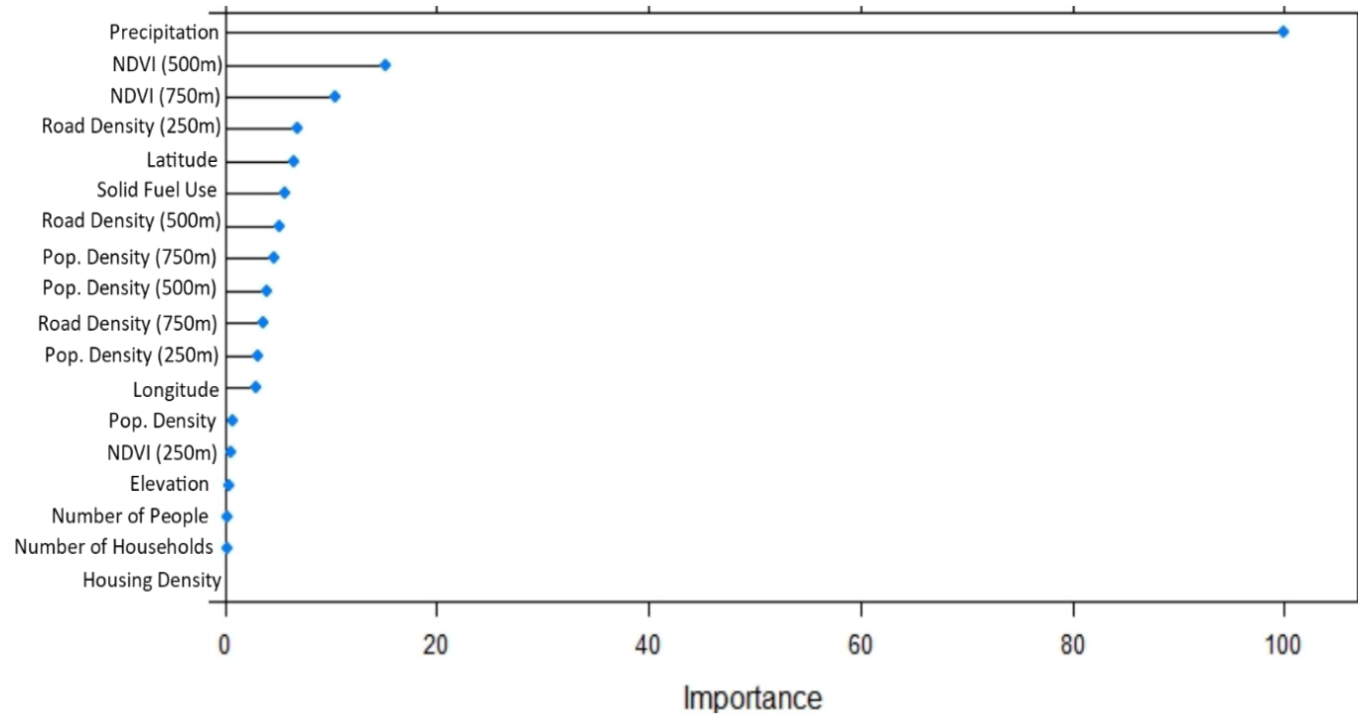

Supplement: Supplementary file 1 [file supplementary]
